# Supplementary material for: Association Between First-Line Immune Checkpoint Inhibition and Survival for Medicare-Insured Patients With Advanced Non–Small Cell Lung Cancer
Source: PubMed Central journal article supplement (PMC8140374; doi:10.1001/jamanetworkopen.2021.11113), 2021-05-21
Supplement: jamanetwopen-e2111113-s001.pdf [file jamanetwopen-e2111113-s001.pdf]

## Supplementary Online Content

Kehl KL, Greenwald S, Chamoun NG, Manberg PJ, Schrag D. Association between first-line immune checkpoint inhibition and survival for Medicare-insured patients with advanced non-small cell lung cancer. *JAMA Netw Open*. 2021;4(5):e2111113. doi:10.1001/jamanetworkopen.2021.11113

**eTable 1.** Propensity Score Model: Pembrolizumab vs Platinum/Pemetrexed

**eTable 2.** Propensity Score Model: Pembrolizumab vs Platinum/Taxane

**eTable 3.** Propensity Score Model: Platinum/Pemetrexed/Pembrolizumab vs Platinum/Pemetrexed

**eTable 4.** Propensity Score-Stratified Associations Between Treatment Regimen and Overall Survival by Age Group

**eFigure 1.** Targeted Therapy Exclusion Cohort Derivation (Sensitivity Analysis)

**eFigure 2.** Kaplan-Meier Overall Survival Curves by Quintile of Baseline Prediction of 1-Year Mortality at Time of Initial Treatment

This supplementary material has been provided by the authors to give readers additional information about their work.

eTable 1. Propensity Score Model: Pembrolizumab vs Platinum/Pemetrexed

|                                                                               | <b>Odds Ratio for Treatment with pembrolizumab vs. platinum/pemetrexed</b> |          |
|-------------------------------------------------------------------------------|----------------------------------------------------------------------------|----------|
| <b>Characteristics</b>                                                        | <b>Odd Ratio Mean (95% CI*)</b>                                            | <b>p</b> |
| <b>Age at the index lung cancer event</b>                                     |                                                                            |          |
| 66-69                                                                         | <b>Reference</b>                                                           |          |
| 70-79                                                                         | 1.32 (1.16-1.50)                                                           | <0.001   |
| 80-89                                                                         | 2.86 (2.44-3.35)                                                           | <0.001   |
| <b>Sex</b>                                                                    |                                                                            |          |
| Male                                                                          | <b>Reference</b>                                                           |          |
| Female                                                                        | 1.23 (1.11-1.37)                                                           | <0.001   |
| <b>Race/Ethnicity</b>                                                         |                                                                            |          |
| White non-Hispanic                                                            | <b>Reference</b>                                                           |          |
| Black non-Hispanic                                                            | 0.83 (0.67-1.04)                                                           | 0.10     |
| Hispanic                                                                      | 0.86 (0.44-1.69)                                                           | 0.67     |
| Other                                                                         | 0.99 (0.77-1.28)                                                           | 0.93     |
| <b>Medicaid enrollment</b>                                                    |                                                                            |          |
| No                                                                            | <b>Reference</b>                                                           |          |
| Yes                                                                           | 1.15 (1.01-1.32)                                                           | 0.04     |
| <b>Median household income in census tract of residence (quintile)</b>        |                                                                            |          |
| Lowest 20%                                                                    | <b>Reference</b>                                                           |          |
| 20-40%                                                                        | 0.93 (0.78-1.12)                                                           | 0.46     |
| 40-60%                                                                        | 0.88 (0.74-1.05)                                                           | 0.16     |
| 60-80%                                                                        | 0.94 (0.78-1.14)                                                           | 0.55     |
| Highest 20%                                                                   | 0.84 (0.69-1.02)                                                           | 0.08     |
| <b>Urban-rural status of patient's county</b>                                 |                                                                            |          |
| Large metro                                                                   | <b>Reference</b>                                                           |          |
| Metro                                                                         | 1.18 (0.95-1.47)                                                           | 0.13     |
| Urban                                                                         | 1.12 (0.98-1.27)                                                           | 0.09     |
| Less urban                                                                    | 1.39 (0.97-1.98)                                                           | 0.07     |
| Rural                                                                         | 1.03 (0.82-1.30)                                                           | 0.78     |
| <b>% of adults with college in patient's zip code of residence (quintile)</b> |                                                                            |          |
| Lowest 20%                                                                    | <b>Reference</b>                                                           |          |
| 20-40%                                                                        | 1.15 (0.95-1.39)                                                           | 0.15     |
| 40-60%                                                                        | 1.17 (0.96-1.43)                                                           | 0.11     |
| 60-80%                                                                        | 1.23 (0.99-1.51)                                                           | 0.06     |
| Highest 20%                                                                   | 1.37 (1.10-1.70)                                                           | 0.005    |
| <b>Risk stratification index (RSI) at baseline</b>                            |                                                                            |          |
| Lowest 20%                                                                    | <b>Reference</b>                                                           |          |
| 20-40%                                                                        | 1.33 (1.12,1.59)                                                           | 0.002    |
| 40-60%                                                                        | 1.57 (1.32,1.87)                                                           | <0.001   |

|                                                         |                      |        |
|---------------------------------------------------------|----------------------|--------|
| 60-80%                                                  | 1.86 (1.57,2.21)     | <0.001 |
| Highest 20%                                             | 2.60 (2.19,3.08)     | <0.001 |
| <b>Date of initial systematic lung cancer treatment</b> |                      |        |
| 2016_Q1                                                 | <b>Reference</b>     |        |
| 2016_Q2                                                 | **                   | **     |
| 2016_Q3                                                 | **                   | **     |
| 2016_Q4                                                 | **                   | **     |
| 2017_Q1                                                 | 37.44 (18.32-76.52)  | <0.001 |
| 2017_Q2                                                 | 55.83 (27.30-114.19) | <0.001 |
| 2017_Q3                                                 | 53.19 (25.97-108.95) | <0.001 |
| 2017_Q4                                                 | 50.48 (24.65-103.37) | <0.001 |
| 2018_Q1                                                 | 64.65 (31.60-132.26) | <0.001 |
| 2018_Q2                                                 | 62.60 (30.53-128.36) | <0.001 |
| 2018_Q3                                                 | 79.97 (38.93-164.29) | <0.001 |
| 2018_Q4                                                 | N/A                  |        |

\*\* Cell information suppressed consistent with Centers for Medicare and Medicaid Services (CMS) cell size suppression policy.

N/A: Too few subjects from Q4 2018 were included in the cohort to provide stable estimates.

eTable 2. Propensity Score Model: Pembrolizumab vs Platinum/Taxane

|                                                                               | <b>Odds Ratio for Treatment with pembrolizumab vs. platinum/taxane</b> |          |
|-------------------------------------------------------------------------------|------------------------------------------------------------------------|----------|
| <b>Characteristics</b>                                                        | <b>Odd Ratio Mean (95% CI*)</b>                                        | <b>P</b> |
| <b>Age at the index lung cancer event</b>                                     |                                                                        |          |
| 66-69                                                                         | <b>Reference</b>                                                       |          |
| 70-79                                                                         | 1.01 (0.90-1.14)                                                       | 0.81     |
| 80-89                                                                         | 1.60 (1.40-1.83)                                                       | <0.001   |
| <b>Sex</b>                                                                    |                                                                        |          |
| Male                                                                          | <b>Reference</b>                                                       |          |
| Female                                                                        | 1.66 (1.52-1.82)                                                       | <0.001   |
| <b>Race/Ethnicity</b>                                                         |                                                                        |          |
| White non-Hispanic                                                            | <b>Reference</b>                                                       |          |
| Black non-Hispanic                                                            | 0.85 (0.71-1.03)                                                       | 0.09     |
| Hispanic                                                                      | 1.43 (0.78-2.61)                                                       | 0.25     |
| Other                                                                         | 1.38 (1.09-1.73)                                                       | 0.006    |
| <b>Medicaid enrollment</b>                                                    |                                                                        |          |
| No                                                                            | <b>Reference</b>                                                       |          |
| Yes                                                                           | 0.74 (0.66-0.83)                                                       | <0.001   |
| <b>Median household income in census tract of residence (quintile)</b>        |                                                                        |          |
| Lowest 20%                                                                    | <b>Reference</b>                                                       |          |
| 20-40%                                                                        | 0.97 (0.84-1.13)                                                       | 0.71     |
| 40-60%                                                                        | 1.06 (0.91-1.23)                                                       | 0.47     |
| 60-80%                                                                        | 1.13 (0.97-1.33)                                                       | 0.11     |
| Highest 20%                                                                   | 1.32 (1.11-1.56)                                                       | 0.001    |
| <b>Urban-rural status of patient's county</b>                                 |                                                                        |          |
| Large metro                                                                   | <b>Reference</b>                                                       |          |
| Metro                                                                         | 0.95 (0.79-1.14)                                                       | 0.57     |
| Urban                                                                         | 0.97 (0.86-1.08)                                                       | 0.55     |
| Less urban                                                                    | 1.03 (0.77-1.38)                                                       | 0.83     |
| Rural                                                                         | 0.87 (0.72-1.06)                                                       | 0.16     |
| <b>% of adults with college in patient's zip code of residence (quintile)</b> |                                                                        |          |
| Lowest 20%                                                                    | <b>Reference</b>                                                       |          |
| 20-40%                                                                        | 1.18 (1.01-1.37)                                                       | 0.04     |
| 40-60%                                                                        | 1.27 (1.08-1.50)                                                       | 0.004    |
| 60-80%                                                                        | 1.34 (1.12-1.60)                                                       | 0.001    |
| Highest 20%                                                                   | 1.73 (1.44-2.09)                                                       | <0.001   |
| <b>Risk stratification index (RSI) at baseline</b>                            |                                                                        |          |
| Lowest 20%                                                                    | <b>Reference</b>                                                       |          |
| 20-40%                                                                        | 1.33 (1.13-1.55)                                                       | <0.001   |

|                                                         |                      |        |
|---------------------------------------------------------|----------------------|--------|
| 40-60%                                                  | 2.01 (1.72-2.34)     | <0.001 |
| 60-80%                                                  | 2.60 (2.24-3.03)     | <0.001 |
| Highest 20%                                             | 4.19 (3.60-4.87)     | <0.001 |
| <b>Date of initial systematic lung cancer treatment</b> |                      |        |
| 2016_Q1                                                 | <b>Reference</b>     |        |
| 2016_Q2                                                 | **                   | **     |
| 2016_Q3                                                 | **                   | **     |
| 2016_Q4                                                 | **                   | **     |
| 2017_Q1                                                 | 34.32 (16.86-69.87)  | <0.001 |
| 2017_Q2                                                 | 39.53 (19.43-80.41)  | <0.001 |
| 2017_Q3                                                 | 35.55 (17.46-72.36)  | <0.001 |
| 2017_Q4                                                 | 40.41 (19.84-82.31)  | <0.001 |
| 2018_Q1                                                 | 49.98 (24.57-101.70) | <0.001 |
| 2018_Q2                                                 | 39.04 (19.18-79.49)  | <0.001 |
| 2018_Q3                                                 | 43.01 (21.13-87.57)  | <0.001 |
| 2018_Q4                                                 | N/A                  |        |

\*\* Cell information suppressed, consistent with Centers for Medicare and Medicaid Services (CMS) cell size suppression policy.

N/A: Too few subjects from Q4 2018 were included in the cohort to provide stable estimates.

eTable 3. Propensity Score Model: Platinum/Pemetrexed/Pembrolizumab vs Platinum/Pemetrexed

|                                                                               | <b>Odds Ratio for Treatment with pembrolizumab/platinum/pemetrexed vs. platinum/pemetrexed</b> |          |
|-------------------------------------------------------------------------------|------------------------------------------------------------------------------------------------|----------|
| <b>Characteristics</b>                                                        | <b>Odd Ratio Mean (95% CI*)</b>                                                                | <b>P</b> |
| <b>Age at the index lung cancer event</b>                                     |                                                                                                |          |
| 66-69                                                                         | <b>Reference</b>                                                                               |          |
| 70-79                                                                         | 1.06 (0.90-1.23)                                                                               | 0.50     |
| 80-89                                                                         | 0.85 (0.68-1.07)                                                                               | 0.16     |
| <b>Sex</b>                                                                    |                                                                                                |          |
| Male                                                                          | <b>Reference</b>                                                                               |          |
| Female                                                                        | 1.00 (0.87-1.14)                                                                               | 0.95     |
| <b>Race/ethnicity</b>                                                         |                                                                                                |          |
| White non-Hispanic                                                            | <b>Reference</b>                                                                               |          |
| Black non-Hispanic                                                            | 0.78 (0.59-1.04)                                                                               | 0.10     |
| Hispanic                                                                      | 0.68 (0.25-1.83)                                                                               | 0.45     |
| Other                                                                         | 0.82 (0.59-1.15)                                                                               | 0.26     |
| <b>Medicaid enrollment</b>                                                    |                                                                                                |          |
| No                                                                            | <b>Reference</b>                                                                               |          |
| Yes                                                                           | 0.92 (0.77-1.11)                                                                               | 0.40     |
| <b>Median household income in census tract of residence (quintile)</b>        |                                                                                                |          |
| Lowest 20%                                                                    | <b>Reference</b>                                                                               |          |
| 20-40%                                                                        | 1.02 (0.81-1.29)                                                                               | 0.86     |
| 40-60%                                                                        | 0.95 (0.75-1.20)                                                                               | 0.64     |
| 60-80%                                                                        | 0.99 (0.77-1.27)                                                                               | 0.95     |
| Highest 20%                                                                   | 0.84 (0.64-1.09)                                                                               | 0.18     |
| <b>Urban-rural status of patient's county</b>                                 |                                                                                                |          |
| Large Metro                                                                   | <b>Reference</b>                                                                               |          |
| Metro                                                                         | 1.15 (0.87-1.51)                                                                               | 0.34     |
| Urban                                                                         | 0.93 (0.78-1.11)                                                                               | 0.41     |
| Less Urban                                                                    | 1.20 (0.78-1.85)                                                                               | 0.41     |
| Rural                                                                         | 0.98 (0.73-1.32)                                                                               | 0.91     |
| <b>% of adults with college in patient's zip code of residence (quintile)</b> |                                                                                                |          |
| Lowest 20%                                                                    | <b>Reference</b>                                                                               |          |
| 20-40%                                                                        | 1.04 (0.82-1.33)                                                                               | 0.74     |
| 40-60%                                                                        | 0.98 (0.76-1.27)                                                                               | 0.90     |
| 60-80%                                                                        | 1.12 (0.85-1.47)                                                                               | 0.41     |
| Highest 20%                                                                   | 1.17 (0.88-1.55)                                                                               | 0.29     |
| <b>Risk stratification index (RSI) at baseline</b>                            |                                                                                                |          |
| Lowest 20%                                                                    | <b>Reference</b>                                                                               |          |
| 20-40%                                                                        | 1.27 (1.02-1.58)                                                                               | 0.03     |

|                                                         |                        |        |
|---------------------------------------------------------|------------------------|--------|
| 40-60%                                                  | 1.44 (1.15-1.78)       | 0.001  |
| 60-80%                                                  | 1.55 (1.24-1.93)       | <0.001 |
| Highest 20%                                             | 1.75 (1.40-2.19)       | <0.001 |
| <b>Date of initial systematic lung cancer treatment</b> |                        |        |
| 2016                                                    | <b>Reference</b>       |        |
| 2017                                                    | 656.55 (92.19-4675.71) | <0.001 |
| 2018                                                    | N/A                    |        |

N/A: Too few subjects from Q4 2018 were included in the cohort to provide stable estimates.

eTable 4. Propensity Score-Stratified Associations Between Treatment Regimen and Overall Survival by Age Group

| Comparison                                                              | Age Cohort   | N     | Propensity score-adjusted results     |                                              |                                 | p      |
|-------------------------------------------------------------------------|--------------|-------|---------------------------------------|----------------------------------------------|---------------------------------|--------|
|                                                                         |              |       | RMST*<br>(95% CI):<br>Reference group | RMST*<br>(95% CI):<br>Pembrolizumab<br>group | RMST*<br>difference<br>(95% CI) |        |
| <b>Pembrolizumab<br/>vs<br/>platinum/pemetrexed</b>                     | <b>66-69</b> | 2,133 | 10.8 (10.4-11.2)                      | 10.7 (9.9-11.5)                              | -0.1 (-0.8, 0.6)                | 0.80   |
|                                                                         | <b>70-79</b> | 4,492 | 11.1 (10.8-11.3)                      | 10.9 (10.3-11.4)                             | -0.2 (-0.7, 0.2)                | 0.33   |
|                                                                         | <b>80-89</b> | 1,613 | 10.7 (10.0-11.4)                      | 10.2 (9.2-11.2)                              | -0.5 (-1.3, 0.3)                | 0.21   |
|                                                                         |              |       |                                       |                                              |                                 |        |
| <b>Pembrolizumab<br/>vs<br/>platinum/taxane</b>                         | <b>66-69</b> | 3,025 | 11.5 (11.2-11.8)                      | 11.2 (10.5-11.9)                             | -0.3 (-1.0, 0.3)                | 0.30   |
|                                                                         | <b>70-79</b> | 7,251 | 11.7 (11.5-11.9)                      | 10.8 (10.4-11.3)                             | -0.9 (-1.3, -0.5)               | <0.001 |
|                                                                         | <b>80-89</b> | 2,669 | 11.2 (10.9-11.6)                      | 10.5 (9.7-11.2)                              | -0.8 (-1.4, -0.2)               | 0.009  |
|                                                                         |              |       |                                       |                                              |                                 |        |
| <b>Pembrolizumab/platinum/pemetrexed<br/>vs<br/>platinum/pemetrexed</b> | <b>66-69</b> | 1,938 | 11.4 (11.0-11.8)                      | 12.3 (11.4-13.1)                             | 1.0 (0.1, 1.8)                  | 0.02   |
|                                                                         | <b>70-79</b> | 3,761 | 11.4 (11.1-11.7)                      | 11.7 (11.1-12.3)                             | 0.3 (-0.2, 0.9)                 | 0.24   |
|                                                                         | <b>80-89</b> | 885   | 10.5 (9.9-11.0)                       | 10.5 (9.2-11.9)                              | 0.1 (-1.1, 1.3)                 | 0.90   |
|                                                                         |              |       |                                       |                                              |                                 |        |



eFigure 1. Targeted Therapy Exclusion Cohort Derivation (Sensitivity Analysis)

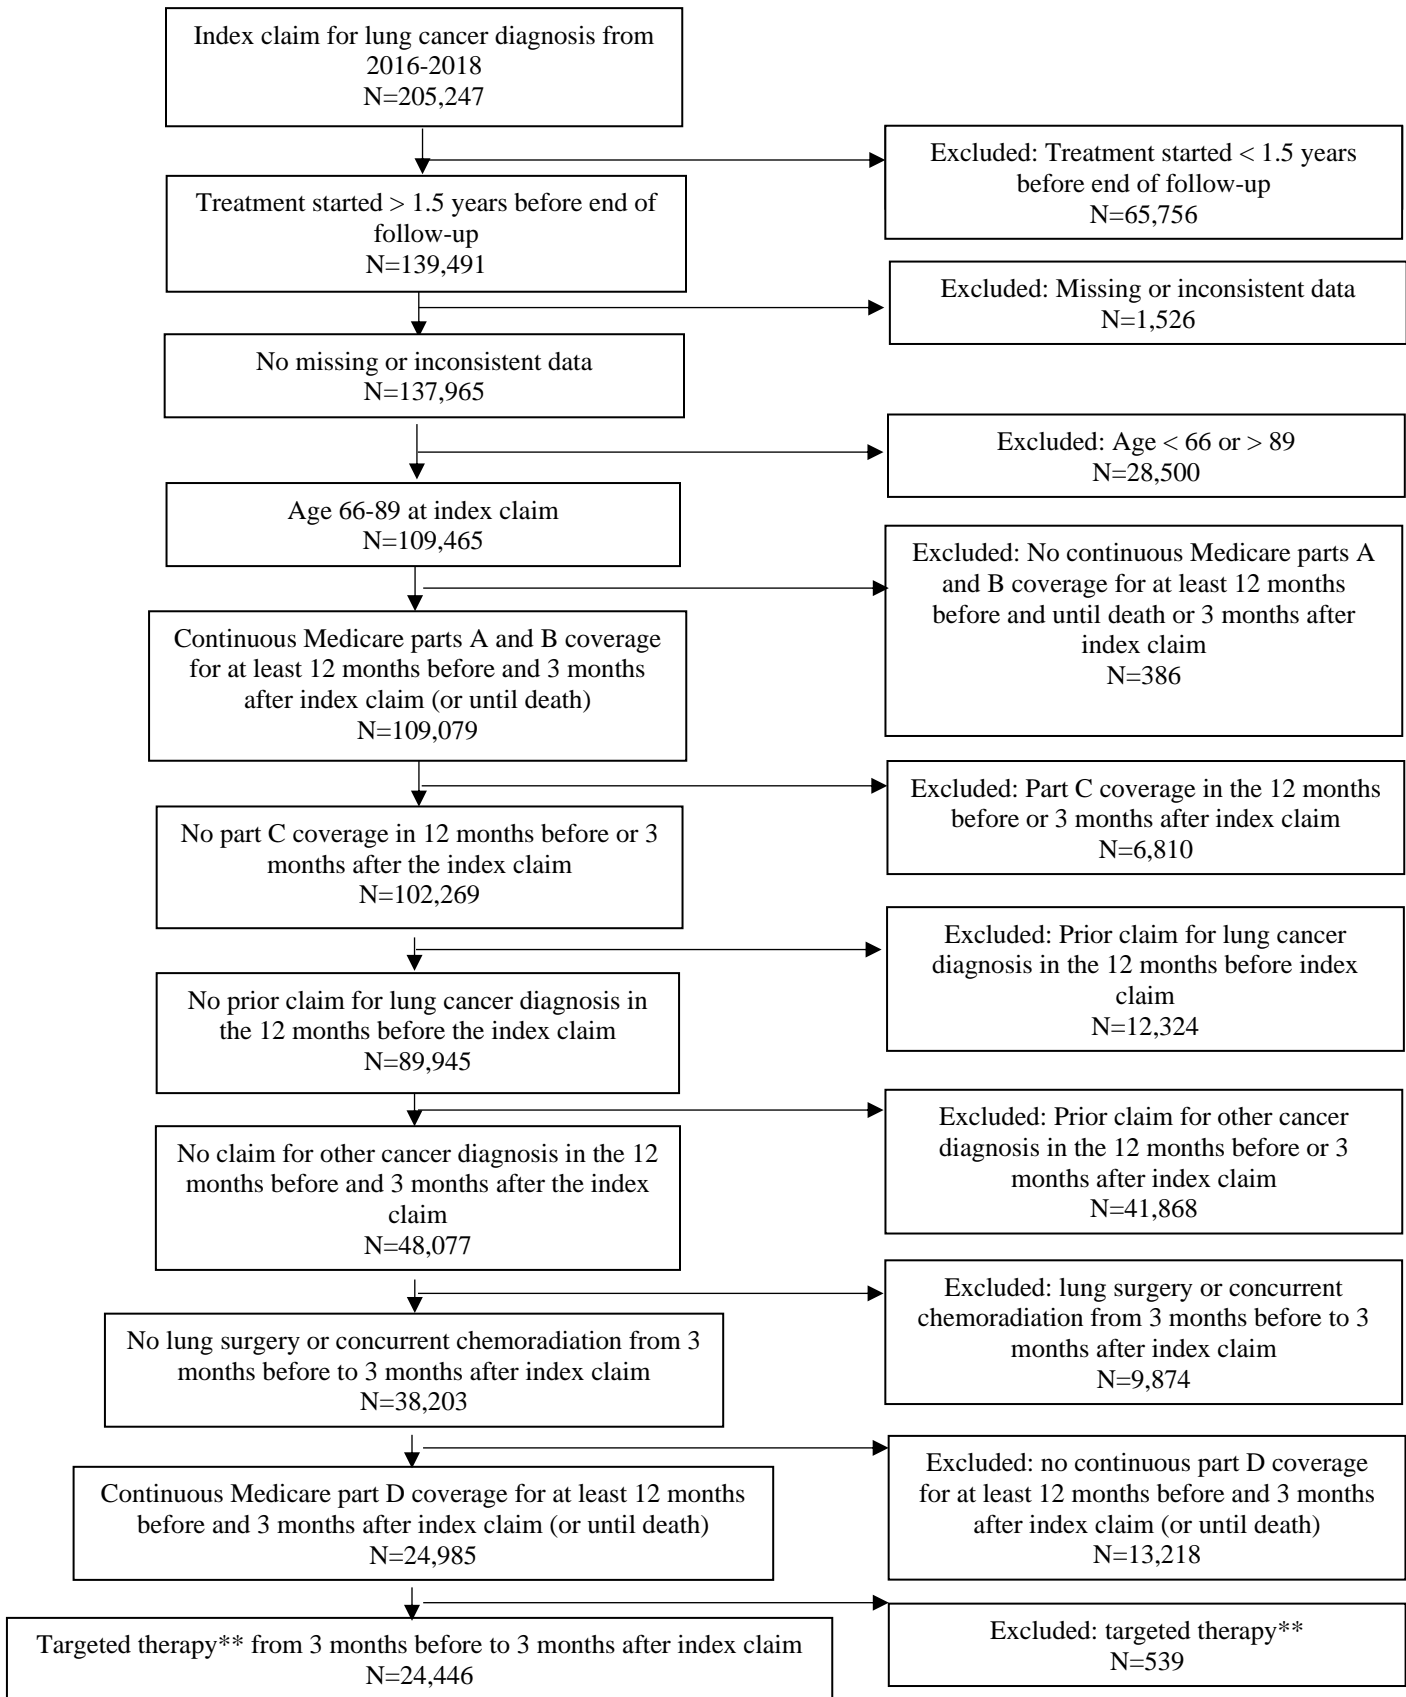

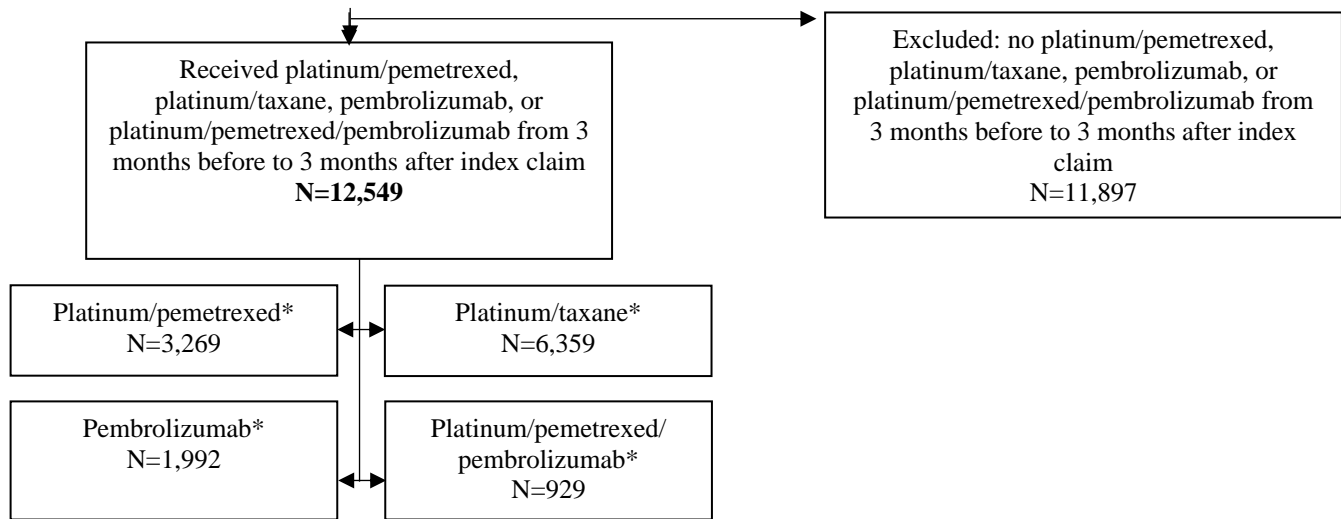

Legend to Figure S1:

\* A treatment regimen was defined as any combination of chemotherapy drugs, the first dose of each of which was administered within 21 days of the first dose of the first drug given in the regimen. Platinum was defined as cisplatin or carboplatin; taxane was defined as paclitaxel, nab-paclitaxel, or docetaxel. Co-administration of bevacizumab was not considered to define a distinct regimen.

\*\* Targeted therapy was defined as any of the following drugs: Gefitinib, erlotinib, afatinib, dacomitinib, osimertinib, crizotinib, ceritinib, brigatinib, alectinib, lorlatinib, dabrafenib, trametinib.

eFigure 2. Kaplan-Meier Overall Survival Curves by Quintile of Baseline Prediction of 1-Year Mortality at Time of Initial Treatment

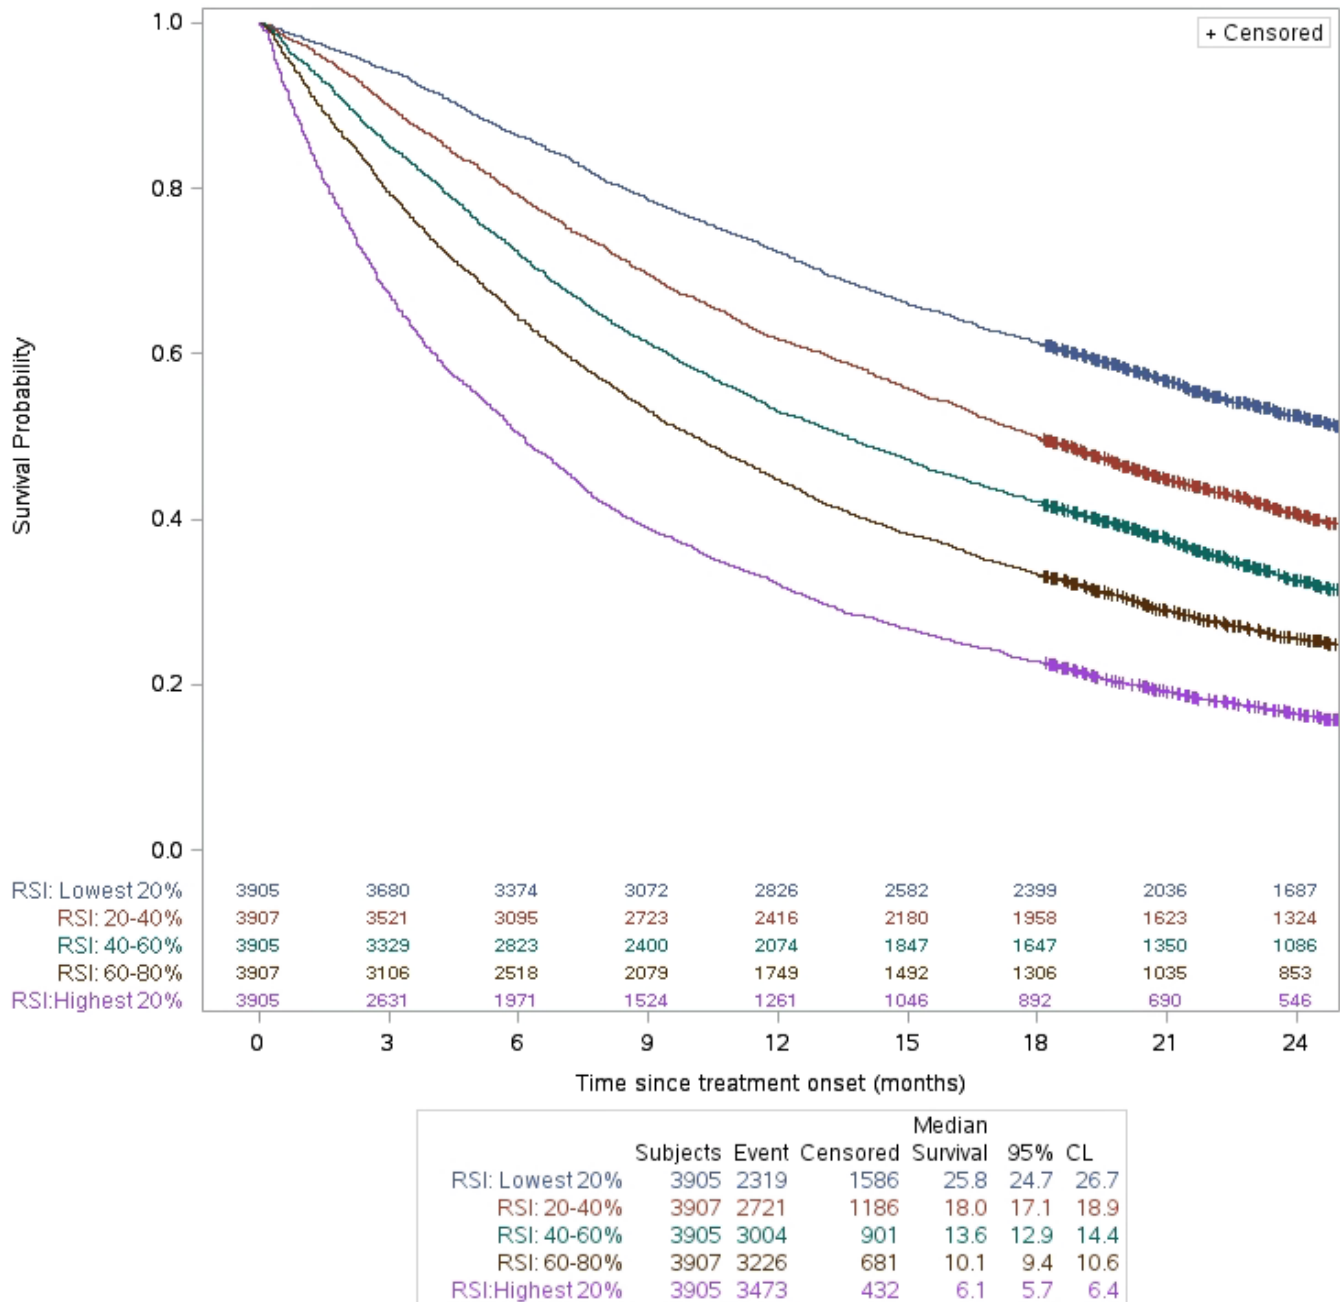

Legend to Figure S2: RSI, Risk stratification index
